# Supplementary material for: A Contemporary Report of Low-Dose-Rate Brachytherapy for Prostate Cancer Using MRI for Risk Stratification: Disease Outcomes and Patient-Reported Quality of Life
Source: MDPI journal article supplement (doi:10.3390/cancers15041336), 2023-02-20
Supplement: s1 [file s1]

**Supplemental Table 1. Global quality of life over time after LDR brachytherapy.**

|            | Urinary Incontinence |     |     |     | Urinary Irritation |     |     |     | Bowel |      |     |     | Sexual |      |     |     |
|------------|----------------------|-----|-----|-----|--------------------|-----|-----|-----|-------|------|-----|-----|--------|------|-----|-----|
|            | N                    | Med | Min | Max | N                  | Med | Min | Max | N     | Med  | Min | Max | N      | Med  | Min | Max |
| Baseline   | 121                  | 100 | 42  | 100 | 114                | 94  | 50  | 100 | 122   | 100  | 46  | 100 | 116    | 74.5 | 0   | 100 |
| 3 months   | 22                   | 77  | 25  | 100 | 20                 | 66  | 38  | 100 | 24    | 93.5 | 46  | 100 | 24     | 23   | 0   | 88  |
| 6 months   | 62                   | 86  | 31  | 100 | 61                 | 81  | 31  | 100 | 64    | 96   | 21  | 100 | 61     | 49   | 0   | 100 |
| 12 months  | 83                   | 100 | 50  | 100 | 82                 | 88  | 31  | 100 | 85    | 96   | 58  | 100 | 84     | 51   | 0   | 100 |
| 24 months  | 93                   | 100 | 40  | 100 | 93                 | 88  | 38  | 100 | 93    | 100  | 46  | 100 | 87     | 57   | 0   | 100 |
| 36 months  | 62                   | 100 | 17  | 100 | 58                 | 94  | 50  | 100 | 63    | 100  | 58  | 100 | 62     | 60.5 | 0   | 100 |
| 48 months  | 48                   | 100 | 61  | 100 | 47                 | 94  | 63  | 100 | 51    | 100  | 25  | 100 | 49     | 63   | 0   | 92  |
| 60+ months | 50                   | 100 | 40  | 100 | 51                 | 94  | 63  | 100 | 49    | 100  | 42  | 100 | 50     | 54   | 0   | 100 |

Supplemental Figure S1. Institutional treatment paradigm at the University of Chicago for prostate cancer management. Brachytherapy was prioritized over external beam radiation for eligible candidates with life expectancy >15 years. Clinical factors such as MRI were used to stratify patients with favorable or unfavorable intermediate risk disease, informing the decision regarding brachytherapy alone or as a supplement to initial external beam. This treatment paradigm represented general institutional practice over a significant portion of the study period, but should not be used in favor of the most current, evidence-based guidelines, such as endorsed by the NCCN.

# Institutional Treatment Paradigm for Intact Prostate Cancer

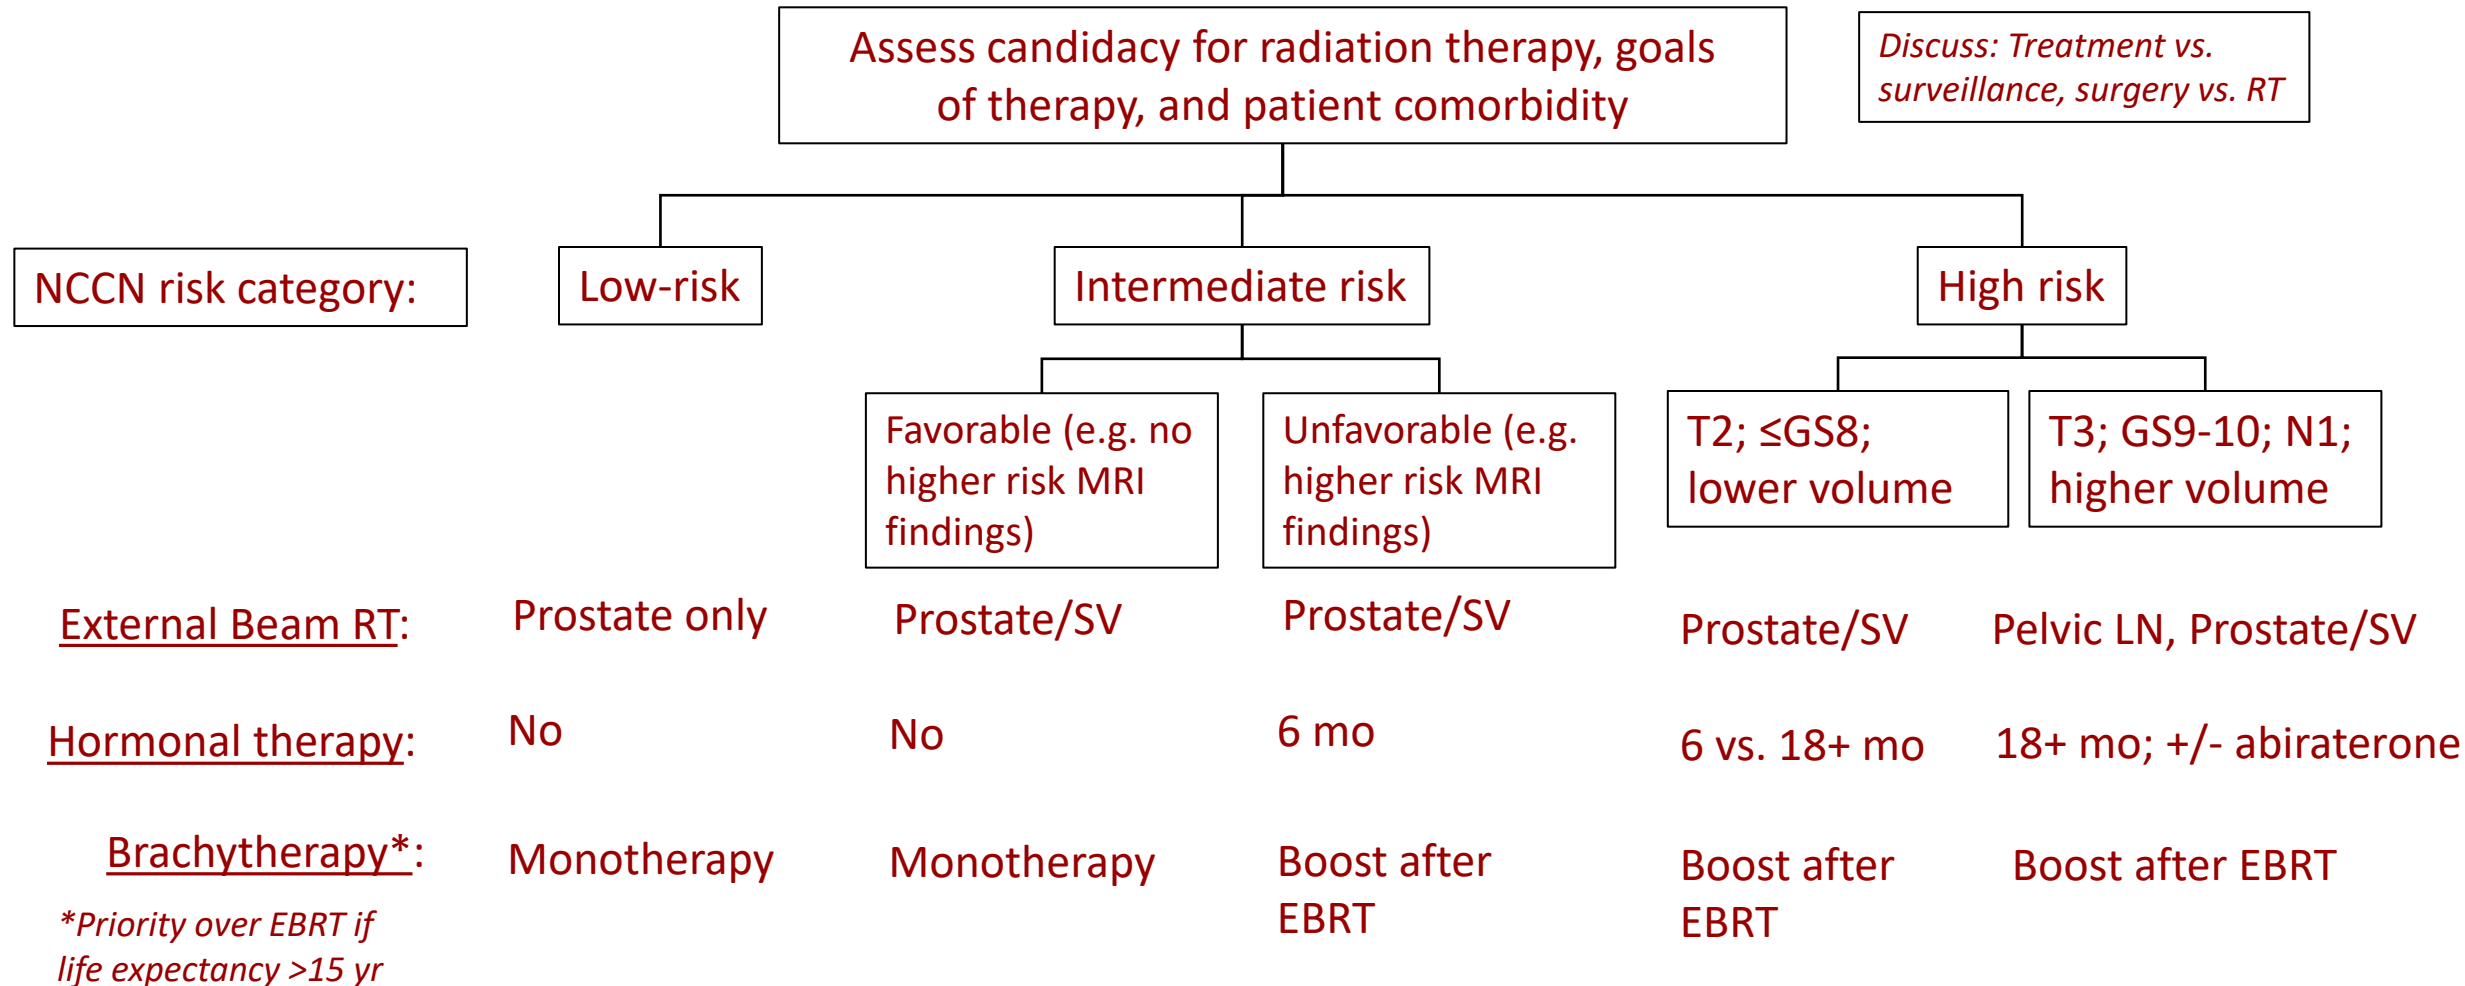

- Medical comorbidity can downstage treatment intensity
- Consider protocol enrollment a priority when eligible
